# Supplementary figures and images for: Inversion kinetics of some E/Z 3-(benzylidene)-2-oxo-indoline derivatives and their in silico CDK2 docking studies
Source: Royal Society of Chemistry journal article supplement (doi:10.1039/d0ra10672k), 2021-01-01

|    | mol                                                                                 | res | uses | rmsd_refine | E_conf | E_place | E_score1 | E_refine  | E_score2 |          |         |
|----|-------------------------------------------------------------------------------------|-----|------|-------------|--------|---------|----------|-----------|----------|----------|---------|
| 1  | 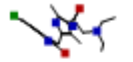    | 1   | 1    | -7.8950     | 1.9970 | 2.4547  | -31.7784 | -66.8321  | -11.8519 | -15.3855 | -8.0750 |
| 2  |    | 1   | 1    | -7.6174     | 2.1373 | 1.4336  | -37.9568 | -122.2436 | -13.6545 | -13.7840 | -7.6174 |
| 3  |    | 1   | 1    | -7.2648     | 3.0354 | 1.7763  | -38.5974 | -101.8147 | -13.1503 | -14.3225 | -7.2648 |
| 4  |    | 1   | 1    | -7.0395     | 4.8907 | 4.9679  | -37.1410 | -79.0411  | -12.4098 | -23.3750 | -7.0395 |
| 5  |    | 1   | 1    | -6.9303     | 3.0962 | 1.3962  | -43.2732 | -109.3105 | -12.2069 | -14.2698 | -6.9303 |
| 6  |    | 1   | 1    | -6.7840     | 2.0373 | 2.0262  | -38.7266 | -93.0384  | -12.7775 | -16.5259 | -6.7840 |
| 7  |    | 1   | 1    | -6.7730     | 2.3435 | 4.8546  | -35.7474 | -76.8814  | -11.7489 | -24.5527 | -6.7730 |
| 8  |    | 1   | 1    | -6.7669     | 2.0379 | 2.0483  | -28.7696 | -94.0989  | -12.1115 | -7.7490  | -6.7669 |
| 9  |    | 1   | 1    | -6.6788     | 3.7331 | 3.0903  | -40.7753 | -88.4736  | -14.4051 | -22.1680 | -6.6788 |
| 10 |    | 1   | 1    | -6.6755     | 2.9104 | 3.2611  | -39.5493 | -76.2300  | -11.7718 | -10.9383 | -6.6755 |
| 11 |    | 1   | 1    | -6.6383     | 3.1652 | 3.7751  | -30.9288 | -82.1568  | -11.7919 | -12.1874 | -6.6383 |
| 12 |    | 1   | 1    | -6.5678     | 6.4827 | 2.4530  | -46.6453 | -90.4309  | -13.3132 | -19.3172 | -6.5678 |
| 13 |   | 1   | 1    | -6.5352     | 2.2298 | 2.5633  | -29.1134 | -95.7916  | -13.1200 | -10.6688 | -6.5352 |
| 14 |  | 1   | 1    | -6.3875     | 4.8412 | 3.7808  | -38.3281 | -57.7213  | -12.3588 | -11.2455 | -6.3875 |
| 15 |  | 1   | 1    | -6.3138     | 4.5594 | 4.1383  | -47.9084 | -64.8454  | -11.7131 | -17.4236 | -6.3138 |

Supplement: d0ra10672k1.pdf [file d0ra10672k1.pdf]
